# Supplementary material for: Synthesis of fluorinated pseudopeptides: metal mediated reversal of stereochemistry in diastereoselective addition of organometallic reagents to N-(tert-butanesulfinyl)-α-fluoroenimines
Source: Royal Society of Chemistry journal article supplement (doi:10.1039/c0ob00773k), 2010-12-24

✓ **Compound (Z)-2-fluoro-3-(4-methoxyphenyl)-2-propen-1-ol:**

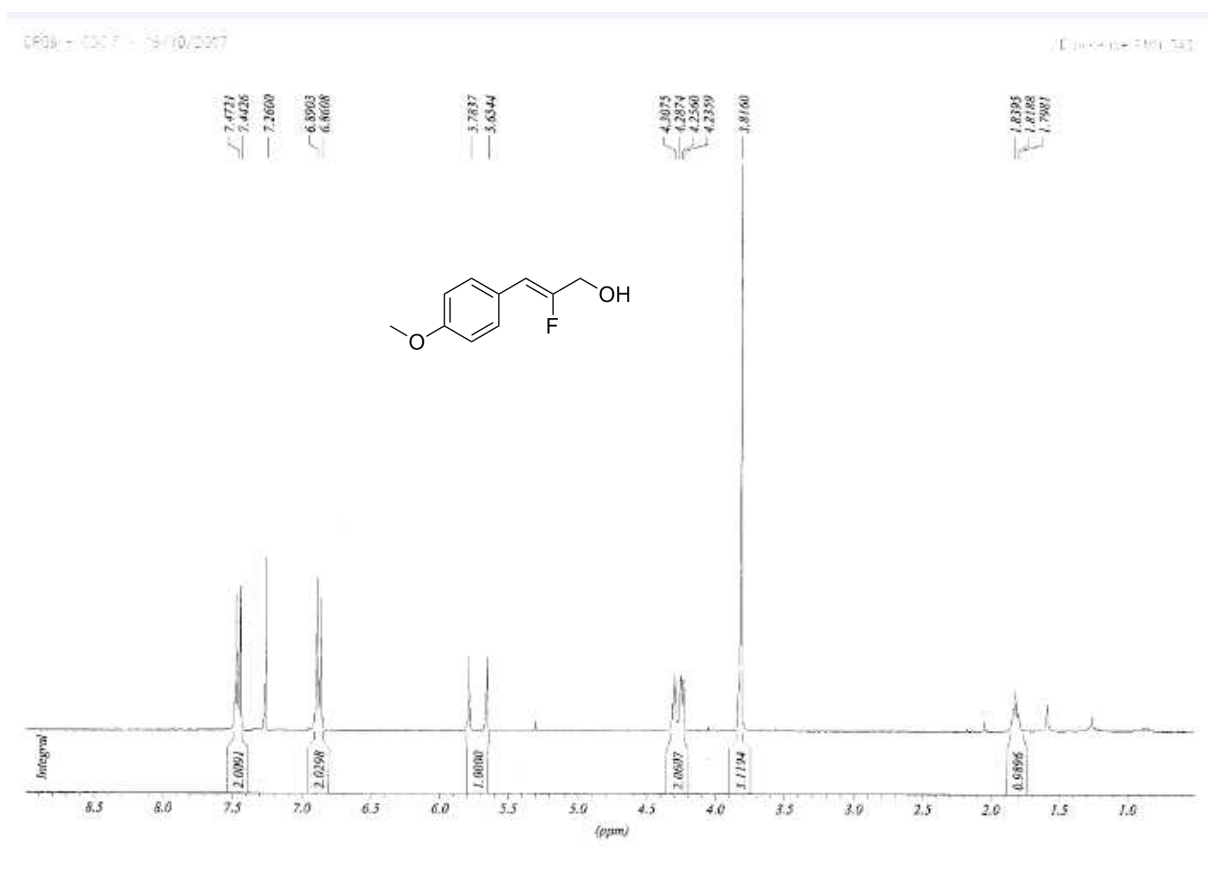

CPD3 - CDCl<sub>3</sub> - 03/07/2006

Chemical structure: COc1ccc(cc1)/C=C(F)CO

Peak list (ppm): -116.5932, -116.6507, -116.7048, -116.7363, -116.7851, -116.8399, -116.5932, -116.6500, -116.7048, -116.7363, -116.7851, -116.8399.

Y-axis: Integral

X-axis: (ppm)

✓ **Compound N-[(Z)-2-fluoro-3-(4-methoxyphenyl)-1-phenyl-2-propenyl]-2-methyl-2-propanesulfonamide (7a)**

0 - F0013 - 12/11, 2007

Experiment RMH

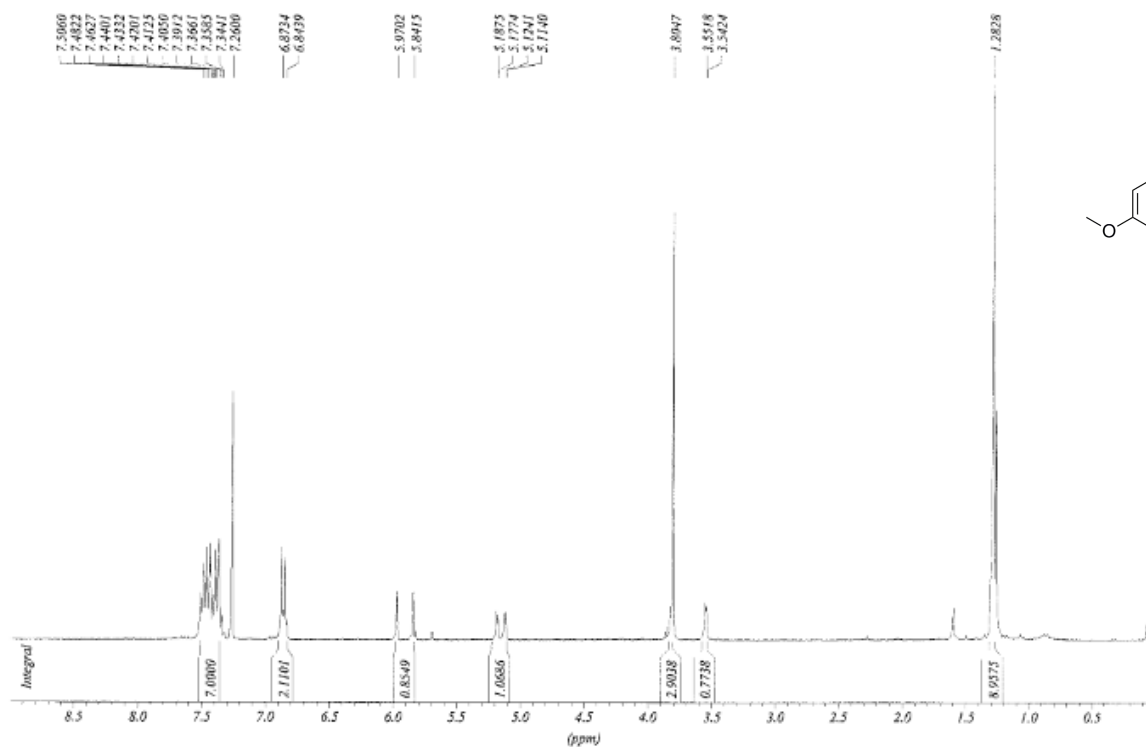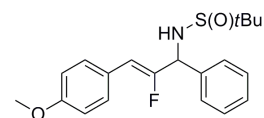

1 F025 - 09/05 - 12/11, 2007

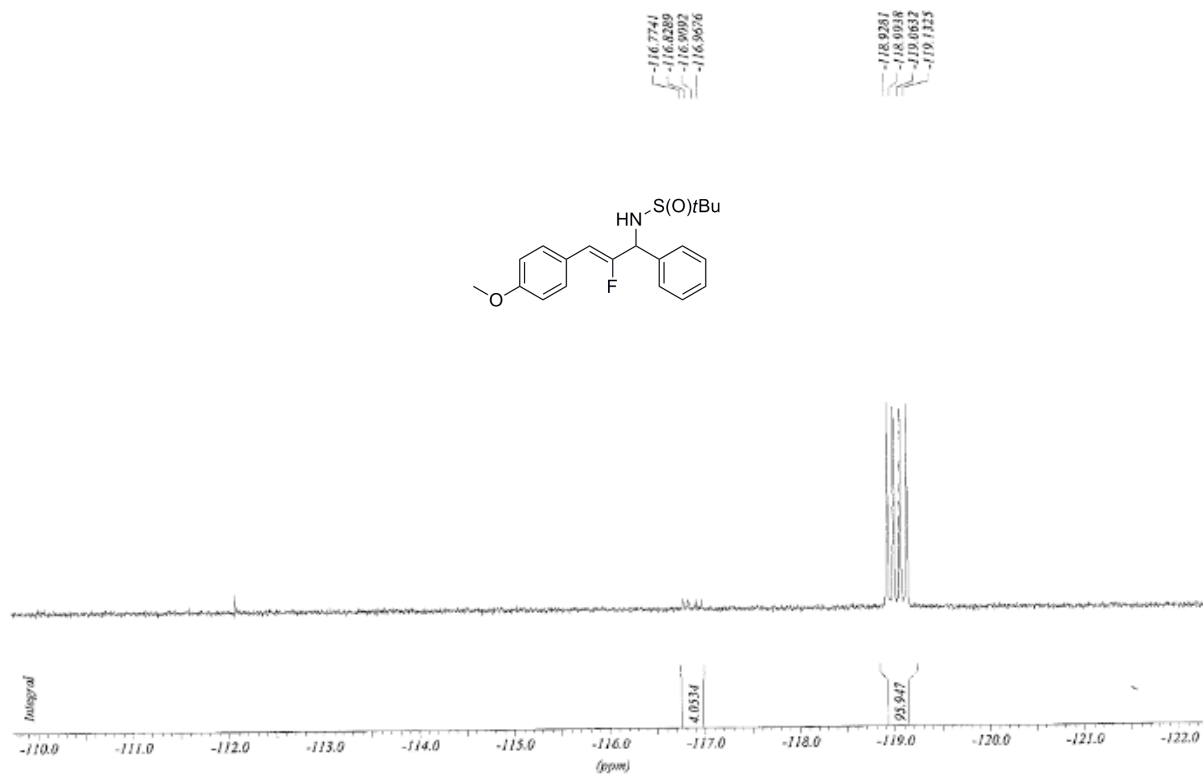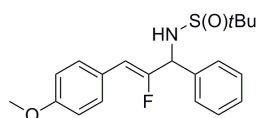

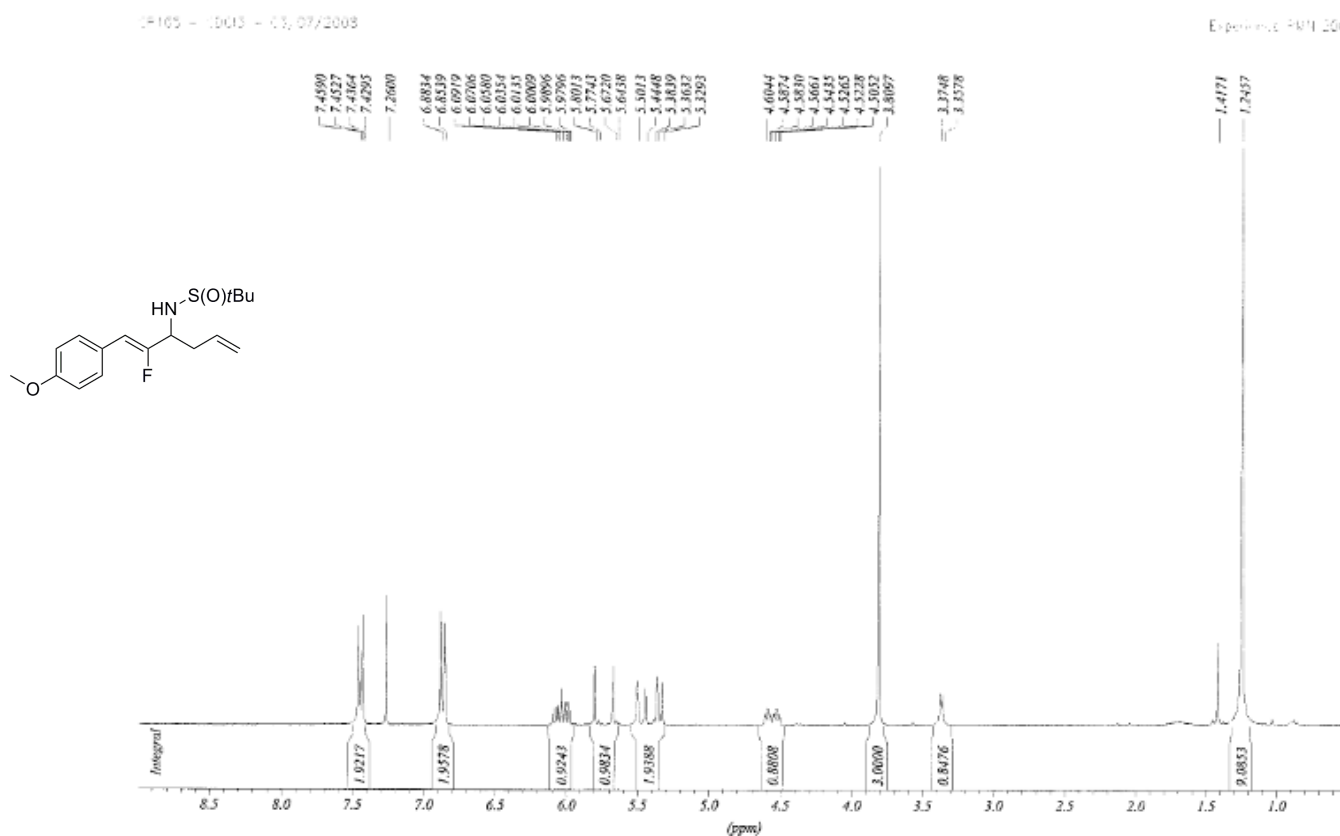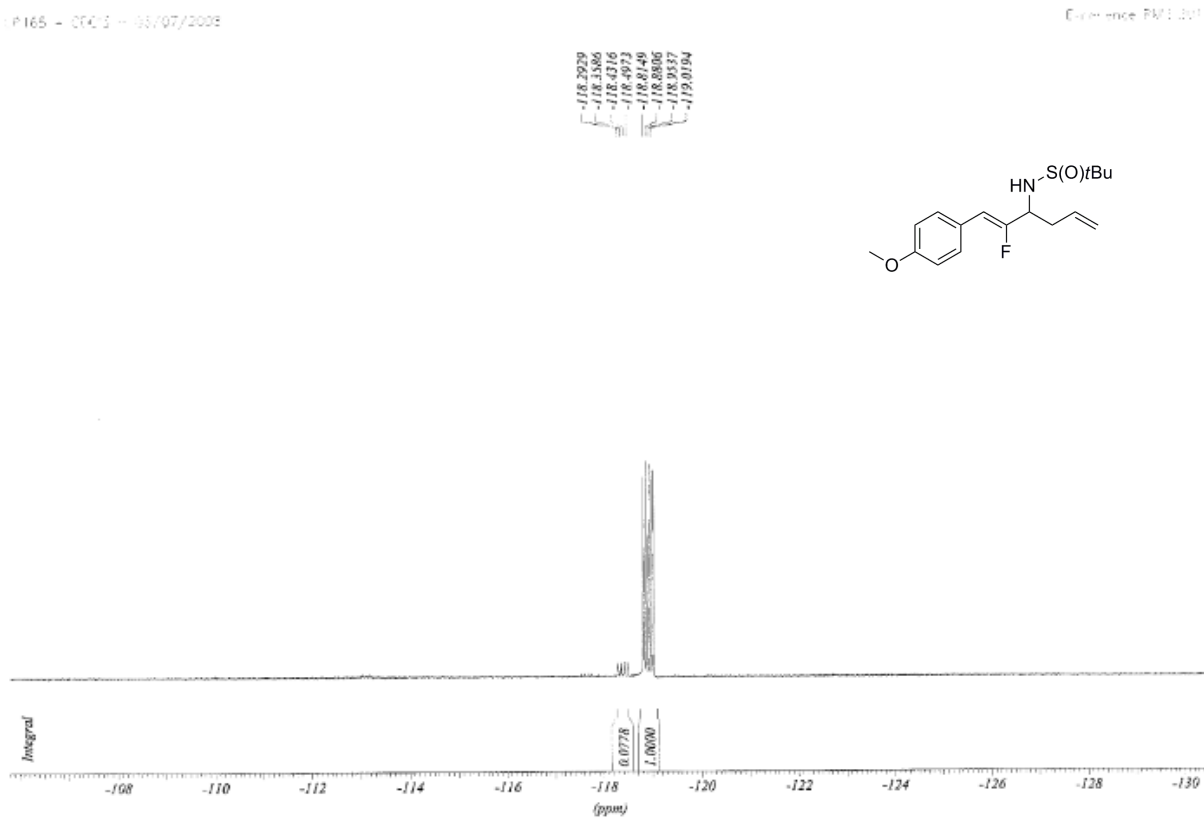

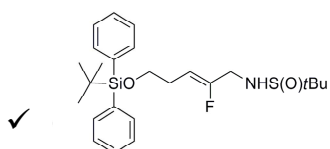

**tert-butyl(diphenyl)silyloxy)-2-fluoro-2-pentenyl)-2-methyl-2-**

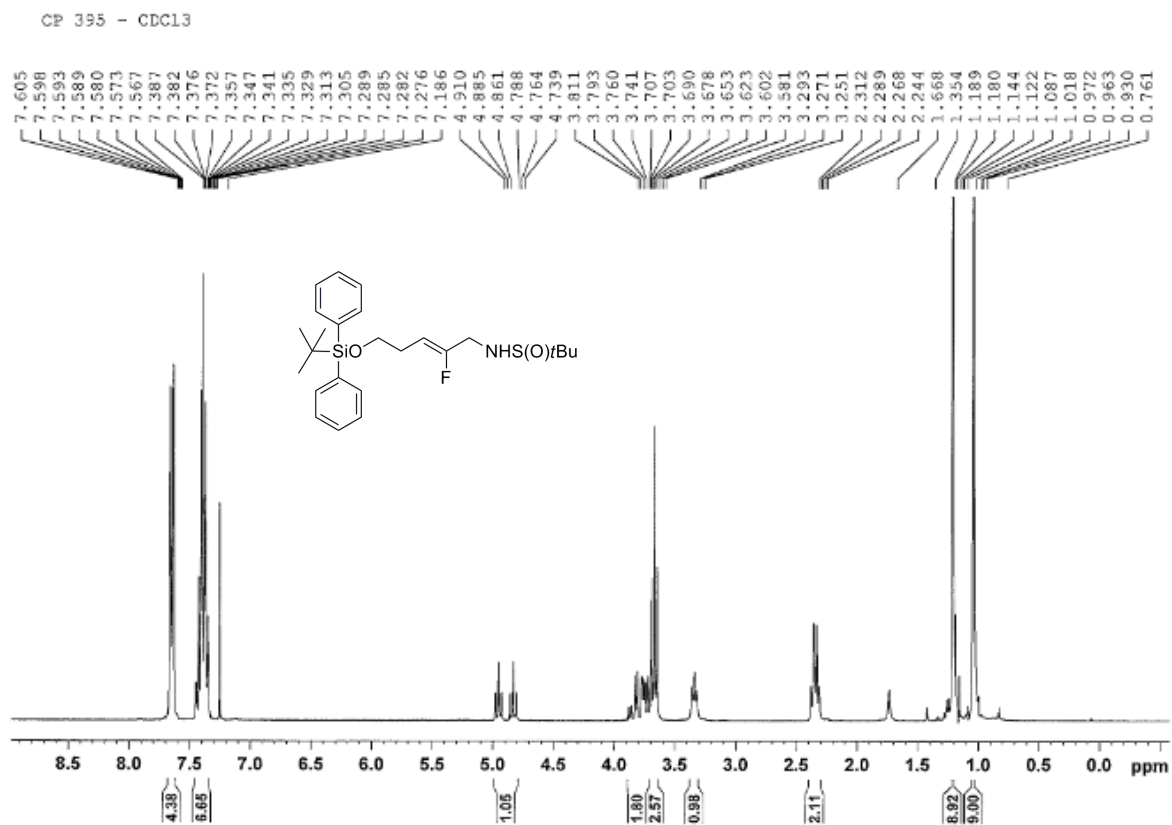

CP395 (Isomere (Z) - colonne : fraction 1 - CDCl<sub>3</sub> - 20/11/2008

Experience RMN 271

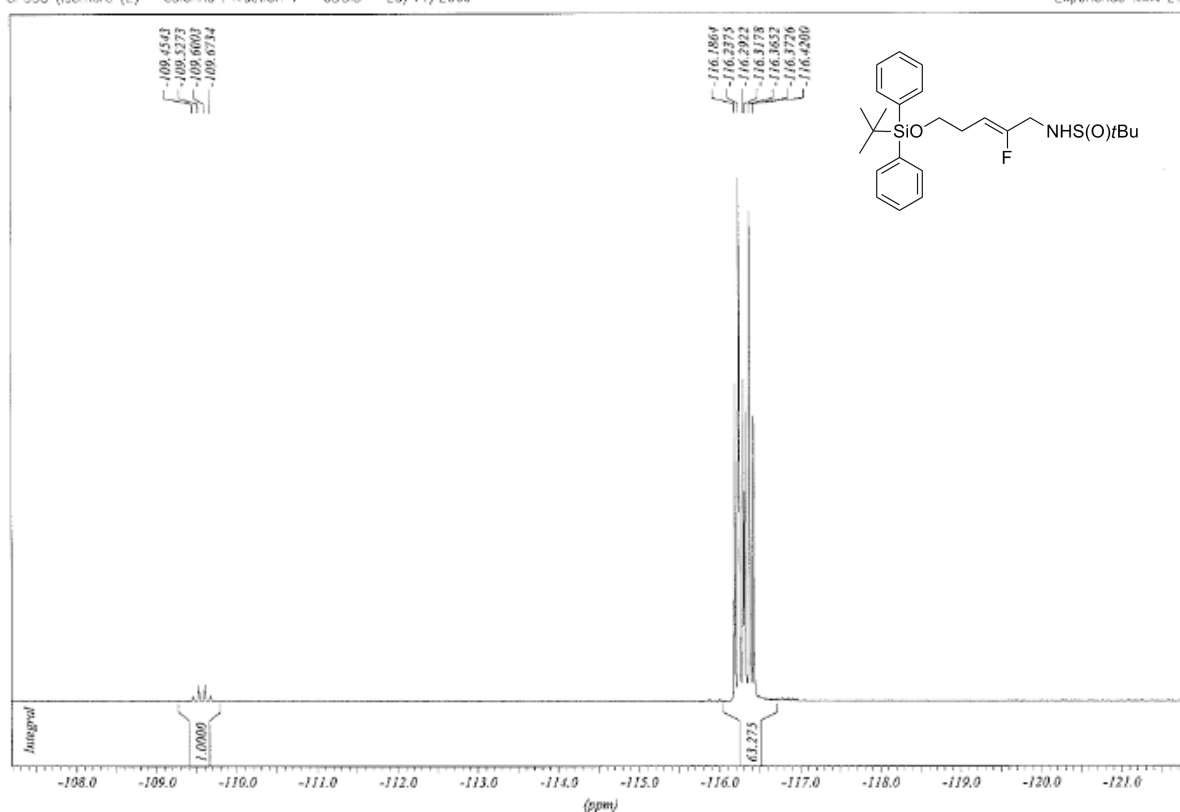

Supplement: c0ob00773k.pdf [file c0ob00773k.pdf]
